# Supplementary material for: Improving the Measurement of Characteristic Parameters for the Determination of GHG Emissions in the Semiconductor and Display Industries in Korea
Source: MDPI journal article supplement (doi:10.3390/app13158834), 2023-07-31
Supplement: s1 [file s1]

# **Supplementary Materials**

## **Improving the Measurement of Characteristic Parameters for the Determination of GHG Emissions in the Semiconductor and Display Industries in Korea**

Bong-Jae Lee\* <sup>1</sup>, Soo-Young Yun <sup>1</sup>, In-Kwon Jeong <sup>1</sup>, Yujin Hwang <sup>1</sup>, Jun-Hyeok Park <sup>1</sup>,  
Jonghoon Kim <sup>1</sup>

<sup>1</sup> Korea Testing & Research Institute (KTR), 98 Gyoyukwon-ro, Gwacheon-si, Gyeonggi-do, 13810, Republic of Korea

\*Corresponding authors. Tel.: +82 2 2092 4056; fax: +82 2 2634 0067.

E-mail addresses: jae8076@ktr.or.kr (Bong-Jae Lee)

| Method | Emission factor          | Explanation                                                                                                            | Tier | Criteria for application of GHG emission factors                                                                              |
|--------|--------------------------|------------------------------------------------------------------------------------------------------------------------|------|-------------------------------------------------------------------------------------------------------------------------------|
| Tier 1 | Default factor           | The default factors specified in the certification guidelines or presented by Greenhouse Gas Information Center (GIR). | -    | Default emission factors present in IPCC Guideline                                                                            |
|        |                          |                                                                                                                        | 2a   | Typical electronics industry type (Semiconductor, Display, PV)                                                                |
| Tier 2 | Country-specific factor  | Country-specific factors verified and published by the Greenhouse Gas Information Center (GIR).                        | 2b   | Electronics industry process type (Etching, CVD) and wafer size ( $\leq 200\text{mm}$ , $300\text{mm}$ )                      |
|        |                          |                                                                                                                        | 2c   | Detailed electronics industry process type (EWC, RPC, IPC, TFD, etc.) and wafer size ( $\leq 200\text{mm}$ , $300\text{mm}$ ) |
| Tier 3 | Facility-specific factor | Emission factors developed and reported through self-measurement by facilities.                                        | 3a   | Reporting facilities use site-specific emission factors                                                                       |
|        |                          | Included all emission factors developed and applied by facilities are not specified in the Tier 1,2 factors.           | 3b   | Reporting facilities measure GHG emission at the stack level                                                                  |

**Table S1.** Composition of Tiers 1, 2, and 3 in the electronics industry based on emission sources using guidelines for estimating and reporting greenhouse gas (GHG) emissions

| Composition      | Detection limit (DL) of FT-IR by gas cell's length |       |       |        |        |        |
|------------------|----------------------------------------------------|-------|-------|--------|--------|--------|
|                  | 1 cm                                               | 10 cm | 60 cm | 100 cm | 400 cm | 500 cm |
| N <sub>2</sub> O | 400                                                | 40    | 7     | 4      | 1      | 0.8    |
| PFCs             | CF <sub>4</sub>                                    | 10    | 1     | 0.2    | 0.1    | 0.025  |
|                  | C <sub>2</sub> F <sub>6</sub>                      | 25    | 2.5   | 0.5    | 0.25   | 0.06   |
|                  | C <sub>3</sub> F <sub>8</sub>                      | 50    | 5     | 1      | 0.5    | 0.125  |
|                  | c-C <sub>4</sub> F <sub>8</sub>                    | 50    | 5     | 1      | 0.5    | 0.125  |
|                  | CHF <sub>3</sub>                                   | 80    | 8     | 1.5    | 0.8    | 0.2    |
| HFCs             | CH <sub>2</sub> F <sub>2</sub>                     | 30    | 3     | 0.6    | 0.3    | 0.075  |
| SF <sub>6</sub>  | 10                                                 | 1     | 0.2   | 0.1    | 0.025  | 0.02   |
| NF <sub>3</sub>  | 50                                                 | 5     | 0.8   | 0.5    | 0.15   | 0.12   |

**Table S2.** The detection limits (DLs) of FT-IR for each gas cell

| Composition | Point-of-use (POU)<br>scrubber | House<br>scrubber |
|-------------|--------------------------------|-------------------|
| Inlet       | 1 cm                           | 10 cm             |
| Outlet      | 10 cm                          | 100 cm            |

**Table S3.** The classification of applicable FT-IR gas cell lengths according to scrubber type

| Gas composition | Concentration                         |
|-----------------|---------------------------------------|
| N <sub>2</sub>  | 85 – 95 %                             |
| O <sub>2</sub>  | 5 – 10 %                              |
| Ar              | Hundreds of thousands ppm             |
| CO <sub>2</sub> | Hundreds of thousands ppm             |
| FCs             | Different depend on process condition |
| Etc.            | Less than 1%                          |

**Table S4.** The gas composition of internal process gas in the electronics manufacturing process

| Pre-set gas concentration (%) |                |                |      |                 |      |
|-------------------------------|----------------|----------------|------|-----------------|------|
| He                            | N <sub>2</sub> | O <sub>2</sub> | Ar   | CO <sub>2</sub> | Kr   |
| 67.46                         | 28.62          | 2.93           | 0.20 | 0.14            | 0.66 |
| 58.02                         | 36.92          | 3.78           | 0.25 | 0.18            | 0.85 |
| 47.95                         | 45.78          | 4.69           | 0.31 | 0.22            | 1.05 |
| 37.20                         | 55.24          | 5.66           | 0.38 | 0.26            | 1.27 |
| 25.68                         | 65.37          | 6.70           | 0.45 | 0.31            | 1.50 |
| 13.31                         | 76.24          | 7.81           | 0.52 | 0.36            | 1.75 |

**Table S5.** Gas compositions according to He gas injections for Experiment 3

| Validity                  |                         |                  | Validity range             |                         |                  | Measured Value |  |  |
|---------------------------|-------------------------|------------------|----------------------------|-------------------------|------------------|----------------|--|--|
| Accuracy                  |                         |                  | Less than 5 %              |                         |                  | 0.07 %         |  |  |
| Precision (Repeatability) |                         |                  | 95 – 105 %<br>(90 – 110 %) |                         |                  | 100.09 %       |  |  |
| Detection limit           |                         |                  | -                          |                         |                  | 1.00 µmol/mol  |  |  |
| Quantitative limit        |                         |                  | -                          |                         |                  | 3.19 µmol/mol  |  |  |
| Analyst 1                 |                         |                  | Analyst 2                  |                         |                  |                |  |  |
| Expected Value<br>(ppm)   | Measured Value<br>(ppm) | Precision<br>(%) | Expected Value<br>(ppm)    | Measured Value<br>(ppm) | Precision<br>(%) |                |  |  |
| 20                        | 19.72                   | 98.60            | 20                         | 19.68                   | 98.40            |                |  |  |
| 40                        | 39.53                   | 98.82            | 40                         | 39.37                   | 98.43            |                |  |  |
| 60                        | 60.05                   | 100.09           | 60                         | 60.13                   | 100.22           |                |  |  |
| 80                        | 80.02                   | 100.02           | 80                         | 80.11                   | 100.14           |                |  |  |
| 100                       | 99.84                   | 99.84            | 100                        | 99.86                   | 99.86            |                |  |  |
| Analyst 3                 |                         |                  | Analyst 4                  |                         |                  |                |  |  |
| Expected Value<br>(ppm)   | Measured Value<br>(ppm) | Precision<br>(%) | Expected Value<br>(ppm)    | Measured Value<br>(ppm) | Precision<br>(%) |                |  |  |
| 20                        | 19.82                   | 99.12            | 20                         | 19.58                   | 97.91            |                |  |  |
| 40                        | 39.46                   | 98.66            | 40                         | 39.35                   | 98.39            |                |  |  |
| 60                        | 60.07                   | 100.12           | 60                         | 60.08                   | 100.13           |                |  |  |
| 80                        | 80.08                   | 100.10           | 80                         | 79.89                   | 99.87            |                |  |  |
| 100                       | 99.93                   | 99.93            | 100                        | 99.56                   | 99.56            |                |  |  |

**Table S6.** Measurements on comparing the validity (CHF<sub>3</sub>) of results between analysts to confirm the precision (reproducibility)

| Validity                  |                         |                  | Validity range             |                         |                  | Measured Value |  |  |
|---------------------------|-------------------------|------------------|----------------------------|-------------------------|------------------|----------------|--|--|
| Accuracy                  |                         |                  | Less than 5 %              |                         |                  | 0.03 %         |  |  |
| Precision (Repeatability) |                         |                  | 95 – 105 %<br>(90 – 110 %) |                         |                  | 99.89 %        |  |  |
| Detection limit           |                         |                  | -                          |                         |                  | 0.55 µmol/mol  |  |  |
| Quantitative limit        |                         |                  | -                          |                         |                  | 1.75 µmol/mol  |  |  |
| Analyst 1                 |                         |                  | Analyst 2                  |                         |                  |                |  |  |
| Expected Value<br>(ppm)   | Measured Value<br>(ppm) | Precision<br>(%) | Expected Value<br>(ppm)    | Measured Value<br>(ppm) | Precision<br>(%) |                |  |  |
| 20                        | 19.85                   | 99.23            | 20                         | 19.65                   | 98.23            |                |  |  |
| 40                        | 39.78                   | 99.44            | 40                         | 39.65                   | 99.12            |                |  |  |
| 60                        | 59.93                   | 99.89            | 60                         | 60.02                   | 100.04           |                |  |  |
| 80                        | 80.12                   | 100.16           | 80                         | 80.23                   | 100.28           |                |  |  |
| 100                       | 100.19                  | 100.19           | 100                        | 100.34                  | 100.34           |                |  |  |
| Analyst 3                 |                         |                  | Analyst 4                  |                         |                  |                |  |  |
| Expected Value<br>(ppm)   | Measured Value<br>(ppm) | Precision<br>(%) | Expected Value<br>(ppm)    | Measured Value<br>(ppm) | Precision<br>(%) |                |  |  |
| 20                        | 19.82                   | 99.12            | 20                         | 19.67                   | 98.37            |                |  |  |
| 40                        | 39.73                   | 99.32            | 40                         | 39.72                   | 99.30            |                |  |  |
| 60                        | 59.95                   | 99.92            | 60                         | 60.04                   | 99.93            |                |  |  |
| 80                        | 80.07                   | 100.09           | 80                         | 80.34                   | 100.42           |                |  |  |
| 100                       | 100.13                  | 100.13           | 100                        | 100.45                  | 100.45           |                |  |  |

**Table S7.** Measurements on comparing the validity (C<sub>2</sub>F<sub>6</sub>) of results between analysts to confirm precision (reproducibility)



| Gas                                  | Tier 2a             | Tier 2b             |                     | Tier 2c             |       |      |     |                     |       |     |      |     |
|--------------------------------------|---------------------|---------------------|---------------------|---------------------|-------|------|-----|---------------------|-------|-----|------|-----|
|                                      | (1-U <sub>i</sub> ) | (1-U <sub>i</sub> ) | (1-U <sub>i</sub> ) | (1-U <sub>i</sub> ) |       |      |     | (1-U <sub>i</sub> ) |       |     |      |     |
|                                      |                     | (≤200mm wafer size) | (300mm wafer size)  | (≤200mm wafer size) |       |      |     | (300mm wafer size)  |       |     |      |     |
|                                      |                     |                     |                     | EWC                 | RPC   | IPC  | TFD | EWC                 | RPC   | IPC | ITC  | TFD |
| CF <sub>4</sub>                      | 0.73                | 0.79                | 0.65                | 0.73                | NA    | 0.92 | NA  | 0.65                | NA    | NA  | NA   | NA  |
| C <sub>2</sub> F <sub>6</sub>        | 0.55                | 0.55                | 0.8                 | 0.72                | NA    | 0.55 | NA  | 0.8                 | NA    | NA  | NA   | NA  |
| C <sub>3</sub> F <sub>8</sub>        | 0.4                 | 0.4                 | 0.3                 | NA                  | NA    | 0.4  | NA  | 0.3                 | 0.063 | NA  | NA   | NA  |
| C <sub>3</sub> F <sub>8</sub> Remote | 0.063               | NA                  | 0.063               | -                   | -     | -    | -   | -                   | -     | -   | -    | -   |
| C <sub>4</sub> F <sub>6</sub>        | 0.15                | 0.12                | 0.15                | 0.12                | NA    | NA   | NA  | 0.15                | NA    | NA  | NA   | NA  |
| c-C <sub>4</sub> F <sub>8</sub>      | 0.13                | 0.12                | 0.18                | 0.14                | NA    | 0.1  | NA  | 0.18                | NA    | NA  | NA   | NA  |
| C <sub>4</sub> F <sub>8</sub> O      | 0.14                | 0.14                | NA                  | NM                  | NA    | 0.14 | NA  |                     |       |     |      |     |
| C <sub>5</sub> F <sub>8</sub>        | 0.085               | 0.072               | 0.1                 | 0.0722              | NA    | NA   | NA  | 0.1                 | NA    | NA  | NA   | NA  |
| CHF <sub>3</sub>                     | 0.47                | 0.51                | 0.38                | 0.51                | NA    | NA   | NA  | 0.38                | NA    | NA  | NA   | NA  |
| CH <sub>2</sub> F <sub>2</sub>       | 0.2                 | 0.13                | 0.2                 | 0.13                | NA    | NA   | NA  | 0.2                 | NA    | NA  | NA   | NA  |
| CH <sub>3</sub> F                    | 0.35                | 0.7                 | 0.32                | 0.7                 | NA    | NA   | NA  | 0.32                | NA    | NA  | NA   | NA  |
| CH <sub>2</sub> F <sub>5</sub>       | 0.064               | 0.064               | NA                  | 0.064               | NA    | NA   | NA  | -                   | -     | -   | -    | -   |
| NF <sub>3</sub> Remote               | 0.02                | 0.028               | 0.018               | -                   | -     | -    | -   | -                   | -     | -   | -    | -   |
| NF <sub>3</sub>                      | 0.18                | 0.18                | 0.18                | 0.19                | 0.028 | 0.18 | NA  | 0.16                | 0.018 | 0.2 | 0.28 | NA  |
| SF <sub>6</sub>                      | 0.55                | 0.58                | 0.29                | 0.55                | NA    | NM   | NA  | 0.29                | NA    | NA  | NA   | NA  |
| N <sub>2</sub> O TFD                 | 0.78                | 1.0                 | 0.5                 | NA                  | NA    | NA   | 1.0 | NA                  | NA    | NA  | NA   | 0.5 |
| N <sub>2</sub> O other               | 1.0                 | 1.0                 | 1.0                 | NA                  | NA    | NA   | NA  | NA                  | NA    | NA  | NA   | NA  |
| COF <sub>2</sub>                     | NM                  | NM                  | NM                  | NM                  | NA    | NM   | NA  | NM                  | NA    | NA  | NA   | NA  |
| F <sub>2</sub>                       | NM                  | NM                  | NM                  | NM                  | NA    | NA   | NA  | NM                  | NA    | NA  | NA   | NA  |

**Table S8.** Default use rate factors for GHG emissions in the semiconductor industry

| Gas                             | Tier 2c             |      |     |      |
|---------------------------------|---------------------|------|-----|------|
|                                 | (1-U <sub>i</sub> ) |      |     |      |
|                                 | Etching             | RPC  | IPC | TFD  |
| CF <sub>4</sub>                 | 0.6                 | NA   | NA  | NA   |
| c-C <sub>4</sub> F <sub>8</sub> | 0.1                 | NA   | NA  | NA   |
| CHF <sub>3</sub>                | 0.2                 | NA   | NA  | NA   |
| NF <sub>3</sub>                 | 0.11                | 0.03 | 0.3 | NA   |
| SF <sub>6</sub>                 | 0.3                 | NA   | 0.9 | NA   |
| N <sub>2</sub> O                | NA                  | NA   | NA  | 0.63 |

**Table S9.** Default use rate factors for GHG emissions in the display industry

| Gas                                  | B <sub>CF4</sub> | B <sub>C2F6</sub> | B <sub>C3F8</sub> | B <sub>C4F6</sub> | B <sub>C4F8</sub> | B <sub>C5F8</sub> | B <sub>CH3F</sub> | B <sub>CH2F2</sub> | B <sub>CHF3</sub> |
|--------------------------------------|------------------|-------------------|-------------------|-------------------|-------------------|-------------------|-------------------|--------------------|-------------------|
| CF <sub>4</sub>                      | NA               | 0.042             | NA                | 5.7e-4            | 0.0013            | 4.7e-4            | 0.002             | 0.0054             | 0.041             |
| C <sub>2</sub> F <sub>6</sub>        | 0.19             | NA                 | 0.002             |
| C <sub>3</sub> F <sub>8</sub>        | 0.2              | 1.8e-5            | NA                | NA                | NA                | NA                | 0*                | NA                 | 1.2e-6            |
| C <sub>3</sub> F <sub>8</sub> Remote | NA               | NA                | NA                | NA                | NA                | NA                | NA                | NA                 | NA                |
| C <sub>4</sub> F <sub>6</sub>        | 0.06             | 0.063             | NA                | NA                | 0.0051            | NA                | 6.4e-4            | 3e-5               | 0.018             |
| c-C <sub>4</sub> F <sub>8</sub>      | 0.099            | 0.02              | NA                | 0.0015            | NA                | 0.0035            | 0.0004            | 2.6e-4             | 0.022             |
| C <sub>4</sub> F <sub>8</sub> O      | 0.13             | 0.045             | NA                | NA                | NA                | NA                | NA                | NA                 | NA                |
| C <sub>5</sub> F <sub>8</sub>        | 0.052            | 0.047             | 5.5e-5            | NA                | NA                | NA                | NA                | NA                 | 0.0053            |
| CHF <sub>3</sub>                     | 0.082            | 0.045             | NA                | 3e-5              | 0.0002            | 8.1e-4            | 0.0011            | 7.7e-4             | NA                |
| CH <sub>2</sub> F <sub>2</sub>       | 0.061            | 0.044             | NA                | NA                | 0.071             | NA                | 0.043             | NA                 | 0.057             |
| CH <sub>3</sub> F                    | 0.028            | 0.01              | NA                | 0.0011            | 0.0065            | NA                | NA                | 0.0021             | 0.015             |
| CH <sub>2</sub> F <sub>5</sub>       | 0.099            | 0.024             | NA                | NA                | NA                | NA                | NA                | NA                 | NA                |
| NF <sub>3</sub> Remote               | 0.034            | NA                 | NA                |
| NF <sub>3</sub>                      | 0.067            | 0.014             | NA                | NA                | NA                | NA                | 0.0021            | 2.3e-5             | 0.0067            |
| SF <sub>6</sub>                      | 0.12             | 0.095             | NA                | NA                | NA                | NA                | 0.0009            | 2.1e-6             | 0.0014            |
| N <sub>2</sub> O TFD                 | NA               | NA                | NA                | NA                | NA                | NA                | NA                | NA                 | NA                |
| N <sub>2</sub> O other               | NA               | NA                | NA                | NA                | NA                | NA                | NA                | NA                 | NA                |
| COF <sub>2</sub>                     | NM               | NM                | NA                | NA                | NA                | NA                | NA                | NA                 | NA                |
| F <sub>2</sub>                       | NM               | NM                | NA                | NA                | NA                | NA                | NA                | NA                 | NA                |

**Table S10.** GHG default emission factors for by-product generation rates in the semiconductor industry (Tier 2a)

| <b>Gas</b>                           | <b>B<sub>CF4</sub></b> | <b>B<sub>C2F6</sub></b> | <b>B<sub>C3F8</sub></b> | <b>B<sub>C5F8</sub></b> | <b>B<sub>CHF3</sub></b> |
|--------------------------------------|------------------------|-------------------------|-------------------------|-------------------------|-------------------------|
| CF <sub>4</sub>                      | NA                     | 0.03                    | NA                      | 7.7e-4                  | 0.059                   |
| C <sub>2</sub> F <sub>6</sub>        | 0.19                   | NA                      | NA                      | NA                      | 0.002                   |
| C <sub>3</sub> F <sub>8</sub>        | 0.2                    | NA                      | NA                      | NA                      | NA                      |
| C <sub>3</sub> F <sub>8</sub> Remote | NA                     | NA                      | NA                      | NA                      | NA                      |
| C <sub>4</sub> F <sub>6</sub>        | 0.1                    | 0.11                    | NA                      | NA                      | 0.066                   |
| c-C <sub>4</sub> F <sub>8</sub>      | 0.11                   | 0.019                   | NA                      | 4.3e-4                  | 0.02                    |
| C <sub>4</sub> F <sub>8</sub> O      | 0.13                   | 0.045                   | NA                      | NA                      | NA                      |
| C <sub>5</sub> F <sub>8</sub>        | NA                     | 0.014                   | NA                      | NA                      | 0.0039                  |
| CHF <sub>3</sub>                     | 0.085                  | 0.035                   | NA                      | 0.0012                  | NA                      |
| CH <sub>2</sub> F <sub>2</sub>       | 0.079                  | 0.025                   | NA                      | NA                      | 0.049                   |
| CH <sub>3</sub> F                    | NA                     | 0.0034                  | NA                      | NA                      | NA                      |
| CH <sub>2</sub> F <sub>5</sub>       | 0.077                  | 0.024                   | NA                      | NA                      | NA                      |
| NF <sub>3</sub> Remote               | 0.015                  | NA                      | NA                      | NA                      | NA                      |
| NF <sub>3</sub>                      | 0.11                   | 0.0059                  | NA                      | NA                      | NA                      |
| SF <sub>6</sub>                      | 0.13                   | 0.11                    | NA                      | NA                      | 0.0011                  |
| N <sub>2</sub> O TFD                 | NA                     | NA                      | NA                      | NA                      | NA                      |
| N <sub>2</sub> O other               | NA                     | NA                      | NA                      | NA                      | NA                      |
| COF <sub>2</sub>                     | NM                     | NM                      | NA                      | NA                      | NA                      |
| F <sub>2</sub>                       | NM                     | NM                      | NA                      | NA                      | NA                      |

**Table S11.** GHG default emission factors for by-product generation rates in the semiconductor industry (Tier 2b, wafer-size, i.e., less than 200mm)

| <b>Gas</b>                           | <b>B<sub>CF4</sub></b> | <b>B<sub>C2F6</sub></b> | <b>B<sub>C3F8</sub></b> | <b>B<sub>C4F6</sub></b> | <b>B<sub>C4F8</sub></b> | <b>B<sub>CH3F</sub></b> | <b>B<sub>CH2F2</sub></b> | <b>B<sub>CHF3</sub></b> |
|--------------------------------------|------------------------|-------------------------|-------------------------|-------------------------|-------------------------|-------------------------|--------------------------|-------------------------|
| CF <sub>4</sub>                      | NA                     | 0.061                   | NA                      | 0.0015                  | 0.0033                  | 0.0053                  | 0.014                    | 0.013                   |
| C <sub>2</sub> F <sub>6</sub>        | 0.21                   | NA                      | NA                      | NA                      | NA                      | NA                      | NA                       | NA                      |
| C <sub>3</sub> F <sub>8</sub>        | 0.21                   | 0.18                    | NA                      | NA                      | NA                      | 7.3e-4                  | NA                       | 0.012                   |
| C <sub>3</sub> F <sub>8</sub> Remote | NA                     | NA                      | NA                      | NA                      | NA                      | NA                      | NA                       | NA                      |
| C <sub>4</sub> F <sub>6</sub>        | 0.059                  | 0.062                   | NA                      | NA                      | 0.0051                  | 6.5e-4                  | 3e-5                     | 0.017                   |
| c-C <sub>4</sub> F <sub>8</sub>      | 0.046                  | 0.028                   | NA                      | 0.008                   | NA                      | 0.0022                  | 0.0014                   | 0.03                    |
| C <sub>4</sub> F <sub>8</sub> O      | NA                     | NA                      | NA                      | NA                      | NA                      | NA                      | NA                       | NA                      |
| C <sub>5</sub> F <sub>8</sub>        | 0.11                   | 0.083                   | 1.2e-4                  | NA                      | NA                      | NA                      | NA                       | 0.0069                  |
| CHF <sub>3</sub>                     | 0.075                  | 0.067                   | NA                      | 0.0001                  | 6.7e-4                  | 0.037                   | 0.0026                   | NA                      |
| CH <sub>2</sub> F <sub>2</sub>       | 0.06                   | 0.044                   | NA                      | NA                      | 0.072                   | 0.0044                  | NA                       | 0.057                   |
| CH <sub>3</sub> F                    | 0.031                  | 0.011                   | NA                      | 0.0012                  | 0.007                   | NA                      | 0.0023                   | 0.016                   |
| CH <sub>2</sub> F <sub>5</sub>       | NA                     | NA                      | NA                      | NA                      | NA                      | NA                      | NA                       | NA                      |
| NF <sub>3</sub> Remote               | 0.038                  | NA                      | NA                      | NA                      | NA                      | NA                      | NA                       | NA                      |
| NF <sub>3</sub>                      | 0.04                   | 0.02                    | NA                      | NA                      | NA                      | 0.0036                  | 3.9e-4                   | 0.011                   |
| SF <sub>6</sub>                      | 0.034                  | 0.041                   | NA                      | NA                      | NA                      | 0.0082                  | 2e-5                     | 0.0039                  |
| N <sub>2</sub> O TFD                 | NA                     | NA                      | NA                      | NA                      | NA                      | NA                      | NA                       | NA                      |
| N <sub>2</sub> O other               | NA                     | NA                      | NA                      | NA                      | NA                      | NA                      | NA                       | NA                      |
| COF <sub>2</sub>                     | NM                     | NM                      | NA                      | NA                      | NA                      | NA                      | NA                       | NA                      |
| F <sub>2</sub>                       | NM                     | NM                      | NA                      | NA                      | NA                      | NA                      | NA                       | NA                      |

**Table S12.** GHG default emission factors for by-product generation rates in the semiconductor industry (Tier 2b, wafer-size, i.e., 300mm)

| Gas                             | EWC              |                   |                   |                   | RPC              |                  | IPC               |  |
|---------------------------------|------------------|-------------------|-------------------|-------------------|------------------|------------------|-------------------|--|
|                                 | B <sub>CF4</sub> | B <sub>C2F6</sub> | B <sub>C3F8</sub> | B <sub>CHF3</sub> | B <sub>CF4</sub> | B <sub>CF4</sub> | B <sub>C2F6</sub> |  |
| CF <sub>4</sub>                 | NA               | 0.046             | 0.0012            | 0.09              | NA               | NA               | NA                |  |
| C <sub>2</sub> F <sub>6</sub>   | 0.1              | NA                | NA                | 0.047             | NA               | 0.21             | NA                |  |
| C <sub>3</sub> F <sub>8</sub>   | NA               | NA                | NA                | NA                | NA               | 0.2              | NA                |  |
| C <sub>4</sub> F <sub>6</sub>   | 0.13             | 0.11              | NA                | 0.066             | NA               | NA               | NA                |  |
| c-C <sub>4</sub> F <sub>8</sub> | 0.11             | 0.037             | 0.0086            | 0.04              | NA               | 0.11             | NA                |  |
| C <sub>4</sub> F <sub>8</sub> O | NM               | NM                | NA                | NA                | NA               | 0.13             | 0.045             |  |
| C <sub>5</sub> F <sub>8</sub>   | NA               | 0.014             | NA                | 0.0039            | NA               | NA               | NA                |  |
| CHF <sub>3</sub>                | 0.085            | 0.035             | 0.0012            | NA                | NA               | NA               | NA                |  |
| CH <sub>2</sub> F <sub>2</sub>  | 0.079            | 0.025             | NA                | 0.049             | NA               | NA               | NA                |  |
| CH <sub>3</sub> F               | NA               | 0.0034            | NA                | NA                | NA               | NA               | NA                |  |
| CH <sub>2</sub> F <sub>5</sub>  | 0.077            | 0.024             | NA                | NA                | NA               | NA               | NA                |  |
| NF <sub>3</sub>                 | 0.004            | 0.025             | NA                | NA                | 0.015            | 0.14             | NA                |  |
| SF <sub>6</sub>                 | 0.13             | 0.11              | NA                | 0.0012            | NA               | NM               | NM                |  |
| N <sub>2</sub> O TFD            | NA               | NA                | NA                | NA                | NA               | NA               | NA                |  |
| N <sub>2</sub> O other          | NA               | NA                | NA                | NA                | NA               | NA               | NA                |  |
| COF <sub>2</sub>                | NM               | NM                | NA                | NA                | NA               | NM               | NM                |  |
| F <sub>2</sub>                  | NM               | NM                | NA                | NA                | NA               | NA               | NA                |  |

**Table S13.** GHG default emission factors for by-product generation rates in the semiconductor industry (Tier 2c, wafer-size, i.e., less than 200mm)

| Gas                             | EWC              |                   |                   |                   |                   |                   |                    |                   | RPC              | IPC              | ITC              |
|---------------------------------|------------------|-------------------|-------------------|-------------------|-------------------|-------------------|--------------------|-------------------|------------------|------------------|------------------|
|                                 | B <sub>CF4</sub> | B <sub>C2F6</sub> | B <sub>C3F8</sub> | B <sub>C4F6</sub> | B <sub>C4F8</sub> | B <sub>CH3F</sub> | B <sub>CH2F2</sub> | B <sub>CHF3</sub> | B <sub>CF4</sub> | B <sub>CF4</sub> | B <sub>CF4</sub> |
| CF <sub>4</sub>                 | NA               | 0.061             | NA                | 0.0015            | 0.0033            | 0.0053            | 0.014              | 0.013             | NA               | NA               | NA               |
| C <sub>2</sub> F <sub>6</sub>   | 0.21             | NA                | NA                | NA                | NA                | NA                | NA                 | NA                | NA               | NA               | NA               |
| C <sub>3</sub> F <sub>8</sub>   | 0.21             | 0.18              | NA                | NA                | NA                | 0.00073           | NA                 | 0.012             | NA               | NA               | NA               |
| C <sub>4</sub> F <sub>6</sub>   | 0.059            | 0.062             | NA                | NA                | 0.0051            | 0.00065           | 0.00003            | 0.017             | NA               | NA               | NA               |
| c-C <sub>4</sub> F <sub>8</sub> | 0.046            | 0.028             | NA                | 0.0083            | NA                | 0.0022            | 0.0014             | 0.03              | NA               | NA               | NA               |
| C <sub>4</sub> F <sub>8</sub> O | 0.11             | 0.083             | 0.00012           | NA                | NA                | NA                | NA                 | 0.0069            | NA               | NA               | NA               |
| C <sub>5</sub> F <sub>8</sub>   | 0.075            | 0.067             | NA                | 0.0001            | 0.00067           | 0.037             | 0.0026             | NA                | NA               | NA               | NA               |
| CHF <sub>3</sub>                | 0.06             | 0.044             | NA                | NA                | 0.072             | 0.0044            | NA                 | 0.057             | NA               | NA               | NA               |
| CH <sub>2</sub> F <sub>2</sub>  | 0.031            | 0.011             | NA                | 0.0012            | 0.007             | NA                | 0.0023             | 0.0016            | NA               | NA               | NA               |
| CH <sub>3</sub> F               | 0.045            | 0.045             | NA                | NA                | NA                | 0.008             | 0.00086            | 0.025             | 0.038            | 0.037            | 0.01             |
| CH <sub>2</sub> F <sub>5</sub>  | 0.034            | 0.041             | NA                | NA                | NA                | 0.0082            | 0.00002            | 0.0039            | NA               | NA               | NA               |
| NF <sub>3</sub>                 | NA               | NA                | NA                | NA                | NA                | NA                | NA                 | NA                | NA               | NA               | NA               |
| SF <sub>6</sub>                 | NA               | NA                | NA                | NA                | NA                | NA                | NA                 | NA                | NA               | NA               | NA               |
| N <sub>2</sub> O<br>TFD         | NM               | NM                | NA                | NA                | NA                | NA                | NA                 | NA                | NA               | NA               | NA               |
| N <sub>2</sub> O<br>other       | NM               | NM                | NA                | NA                | NA                | NA                | NA                 | NA                | NA               | NA               | NA               |
| COF <sub>2</sub>                | NA               | 0.061             | NA                | 0.0015            | 0.0033            | 0.0053            | 0.014              | 0.013             | NA               | NA               | NA               |
| F <sub>2</sub>                  | 0.21             | NA                | NA                | NA                | NA                | NA                | NA                 | NA                | NA               | NA               | NA               |

**Table S14.** GHG default emission factors for by-product generation rates in the semiconductor industry (Tier 2c, wafer-size, i.e., 300 mm)

| Gas                             | B <sub>CF<sub>4</sub></sub> | B <sub>C<sub>2</sub>F<sub>6</sub></sub> | B <sub>CHF<sub>3</sub></sub> |
|---------------------------------|-----------------------------|-----------------------------------------|------------------------------|
| CF <sub>4</sub>                 | NA                          | NA                                      | NA                           |
| c-C <sub>4</sub> F <sub>8</sub> | 0.009                       | NA                                      | 0.02                         |
| CHF <sub>3</sub>                | 0.07                        | 0.05                                    | NA                           |
| NF <sub>3</sub>                 | NA                          | NA                                      | NA                           |
| SF <sub>6</sub>                 | NA                          | NA                                      | NA                           |
| N <sub>2</sub> O                | NA                          | NA                                      | NA                           |

**Table S15.** GHG default emission factors for by-product generation rates in the display industry (Tier 2c)
